# Supplementary material for: The Vaccine Hesitancy Profiles and Determinants of Seasonal Influenza among Chinese Community Healthcare Workers: A Cross-Sectional Study
Source: MDPI journal article supplement (doi:10.3390/vaccines10091547), 2022-09-16
Supplement: s1 [file s1]

**Knowledge, Attitudes, and Practice Survey Questionnaire: Community healthcare workers regarding the seasonal influenza vaccine**

**i. General and Demographic Questions**

1. Name of interviewer: \_\_\_\_\_
2. Gender: ☐ male ☐ female
3. Date of birth: ...../...../.....
4. Area of residence: ☐ urban ☐ rural
5. What is your education level?
  - a) ☐ Middle school or lower
  - b) ☐ High/secondary level or lower
  - c) ☐ Junior college
  - d) ☐ Bachelor
  - e) ☐ Postgraduate or higher
6. Years of medical service: \_\_\_\_\_
7. What is your highest degree major?
  - a) ☐ Clinical medicine
  - b) ☐ Traditional Chinese medicine
  - c) ☐ Integrative medicine
  - d) ☐ Nursing
  - e) ☐ Preventive medicine or public health
  - f) ☐ Others
8. What is your professional qualification?
  - a) ☐ Primary title or lower
  - b) ☐ Middle title
  - c) ☐ Senior title

**ii. Knowledge, attitudes, and practice regarding influenza and influenza vaccine**

**9. How about your health condition ?**

- a) ☐ Good
- b) ☐ General
- c) ☐ Fair
- d) ☐ poor

**10. Have you had influenza-like illness (ILI) in the past 3 years ?**

- a) ☐ Yes
- b) ☐ No
- c) ☐ I don't know

**11. Have you had influenza in the past 3 years ?**

- a) ☐ Yes
- b) ☐ No
- c) ☐ I don't know

**12. Have you asked for leave due to influenza or ILI in the past 3 years?**

- a) ☐ Yes, about \_\_\_\_ days
- b) ☐ No

**13. Did you receive the influenza vaccine in the last flu season?**

- a) ☐ Yes
- b) ☐ No (skip to question 15)

**14. How do you pay for influenza vaccination?**

- a) ☐ Self-paid
- b) ☐ Free
- c) ☐ Medical insurance
- d) ☐ I don't remember

**15. Do you plan to receive the influenza vaccine in the next flu season?**

- a) ☐ Yes
- b) ☐ No (skip to question 16)
- c) ☐ I don't know (skip to question 16)

**16. Why don't you plan to receive the influenza vaccine in the next flu season? (Open-ended question)**

- a) ☐ Concerned about adverse reactions
- b) ☐ Influenza vaccination is unnecessary
- c) ☐ Lack of time during working hours
- d) ☐ Inconvenience vaccination service
- e) ☐ Vaccination fee is not free
- f) ☐ Unknown about contraindications of influenza vaccines
- g) ☐ Concerned about vaccine efficacy
- h) ☐ Doubt about vaccine quality
- i) ☐ Others, \_\_\_\_\_
- j) ☐ I don't remember

**17. Have you recommended your patients receive the influenza vaccine?**

- a) ☐ Yes
- b) ☐ No
- c) ☐ I don't know

**18. Why don't you recommend your patients receive the influenza vaccine? (Multiple choice)**

- a) ☐ Unknown about contraindications of influenza vaccines, and dare not recommend it to patients
- b) ☐ Concerned about patients' misunderstanding of selling vaccines
- c) ☐ Beyond the scope of HCW's responsibility
- d) ☐ Uncertainty of vaccine effectiveness to patients

- e) ☐ Patients do not trust the HCW's recommendations on vaccines

**19. What do you think is the coverage rate of influenza vaccine for the whole population in China?**

- a) ☐ Less than 10%  
 b) ☐ 10%~20%  
 c) ☐ 20%~30%  
 d) ☐ Above 30%

**20. Which of the following 4 statements is correct ? (Multiple choice)**

- a) ☐ There is no difference between influenza and cold  
 b) ☐ The whole population is susceptible to influenza  
 c) ☐ Immunization is an important strategy for preventing influenza  
 d) ☐ Influenza virus is transmitted mainly by droplets and aerosols originating from the respiratory secretions of infected people and occasionally via contact with virus-contaminated fomites.

**21. As you know, what are the factors that affect the public to receive the flu vaccine ? (Open-ended question)**

- a) ☐ Unknown about influenza vaccines  
 b) ☐ Inconvenience vaccination service  
 c) ☐ Influenza vaccines price is too high to be acceptable  
 d) ☐ It's unnecessary to receive the influenza vaccine  
 i) ☐ Others,\_\_\_\_\_

**iii. Influenza vaccine hesitancy**

**22. It's necessary to get an influenza vaccination against influenza ?**

- a) ☐ Strongly agree  
 b) ☐ Agree to some extent  
 c) ☐ Neutral  
 d) ☐ Disagree to some extent  
 i) ☐ Strongly disagree

**23. The following 9 statements are about seasonal flu and flu vaccine, please state your point of view regarding them.**

|                                                         | <u><b>Strongly Agree</b></u> | <u><b>Agree</b></u> | <u><b>Neutral</b></u> | <u><b>Disagree</b></u> | <u><b>Strongly Disagree</b></u> |
|---------------------------------------------------------|------------------------------|---------------------|-----------------------|------------------------|---------------------------------|
| a. Flu vaccine is effective                             |                              |                     |                       |                        |                                 |
| b. Flu vaccine is safe.                                 |                              |                     |                       |                        |                                 |
| c. I worry about the flu vaccine for vaccine incidents. |                              |                     |                       |                        |                                 |

|                                                                       |  |  |  |  |  |
|-----------------------------------------------------------------------|--|--|--|--|--|
| d. I have a high risk of getting flu.                                 |  |  |  |  |  |
| e. Flu is a big threat to my health.                                  |  |  |  |  |  |
| f. Flu vaccine is necessary to prevent me from getting flu.           |  |  |  |  |  |
| g. The traffic from my house to the vaccination clinic is convenient. |  |  |  |  |  |
| h. I can afford the flu vaccine.                                      |  |  |  |  |  |
| i. I can easily find time to the clinic for flu vaccination.          |  |  |  |  |  |
